# Supplementary material
Source: PubMed Central journal article supplement (PMC3190866)
Supplement: supp_M111.259101_jbc.M111.259101-1.pdf [file supp_M111.259101_jbc.M111.259101-1.pdf]

## Supplemental Figures

**Supplementary Fig. 1** Identification of *Nrl* and *cpfl1* wild-type and mutant allele. PCR analysis using primers listed in Supplementary table 2. Genomic DNA was prepared using an ear punch obtained from indicated mice. Genotyping results were further confirmed by sequencing.

**Supplementary Fig. 2** Normalized intensity-luminance plot. Data from a-wave (**A**) and b-wave (**B**) responses shown in Fig. 2.

**Supplementary Fig. 3** Western blots demonstrating the specificity of antibodies used in this study. **A.** Equal amounts of cellular extracts (150 µg protein) from transiently transfected HEK293 cells with indicated plasmids were separated by PAGE gels followed by immunoblotting with subunit specific PDE6 antibodies. **B.** Rod photoreceptor specific proteins, GC-F and Gαt1 are absent in retinal extracts from *Nrl*<sup>-/-</sup> and *Nrl*<sup>-/-</sup> *cpfl1* mice. Retinal extracts from *cpfl1*/+ mice serve as positive control demonstrating expression of GC-F and Gαt1 in the rod-dominated retina.

**Supplementary Fig. 4** Alignment of amino acid residues from PDE6 catalytic subunits showing unique peptides identified by mass-spectrometry. PDE6 present in *Nrl*<sup>-/-</sup> *cpfl1* retinal extracts, immunoprecipitated by ROS-I monoclonal antibody, were separated on 4-20% gradient PAGE gel. Coomassie-stained proteins in the range of PDE6 molecular weight were cut out and analyzed by MALDI-LC MS/MS (Applied Biomics). Trypsin

digestion followed by MS/MS found 27 peptides identifying Rod PDE6 $\alpha$  and  $\beta$  at 100% confidence. No peptides corresponding to cone PDE6 $\alpha$ ' were found in this analysis.

**Supplementary Fig. 5** Expression of rod PDE6, GC-E, and absence of M-opsin in adult *Nrl*<sup>-/-</sup> *cpfl1* mice. Frozen retinal sections from P30 animals were used for immunolocalization. Rod PDE6 proteins were identified using MOE, an antibody that recognizes rod PDE6 $\alpha\beta\gamma$  and rod PDE6 $\beta$  subunit specific antibody. PNA, a cone marker, is stained in red. ToPRO3 staining in blue marks the nuclei. PDE $\alpha\beta\gamma$  staining (**AB**, upper panel), PDE $\beta$  (**AB**, middle panel), GC-E (**AB**, bottom panel), S-opsin (**CD**, upper panel) and M-opsin (**CD**, lower panel) staining are shown in green.

**Supplementary Fig. 6** M-opsin mis-localization in the absence of cone PDE6 is not due to cell death. Propidium iodide (PI) staining (red) in retinal sections from *cpfl1* mice at P14 showed few apoptotic cells (brighter red, indicated with an arrow). Note that M-opsin staining (green) does not overlap with PI staining.

**Supplementary Fig. 7** Mislocalization of M-opsin (green, panel B). In contrast, S-opsin (green, panel A) is localized to outer segments. Residual PDE6 $\alpha$  subunit is transported to outer segments (green, panel C). As expected, PDE6 $\beta$  subunit is undetectable (panel D). Retinal sections are from *Nrl*<sup>-/-</sup> *cpfl1 rd* mutant mice at P12. Red staining by PNA marks cone photoreceptor cells.

Supplementary Fig. 1

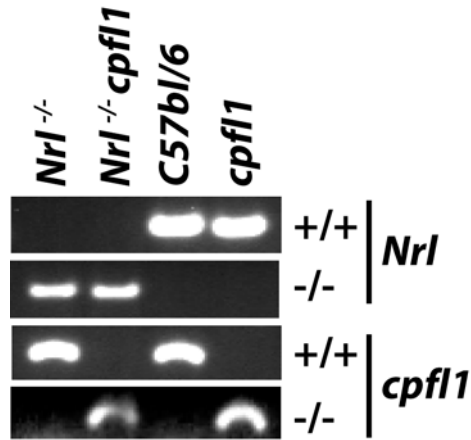

Supplementary Fig. 2

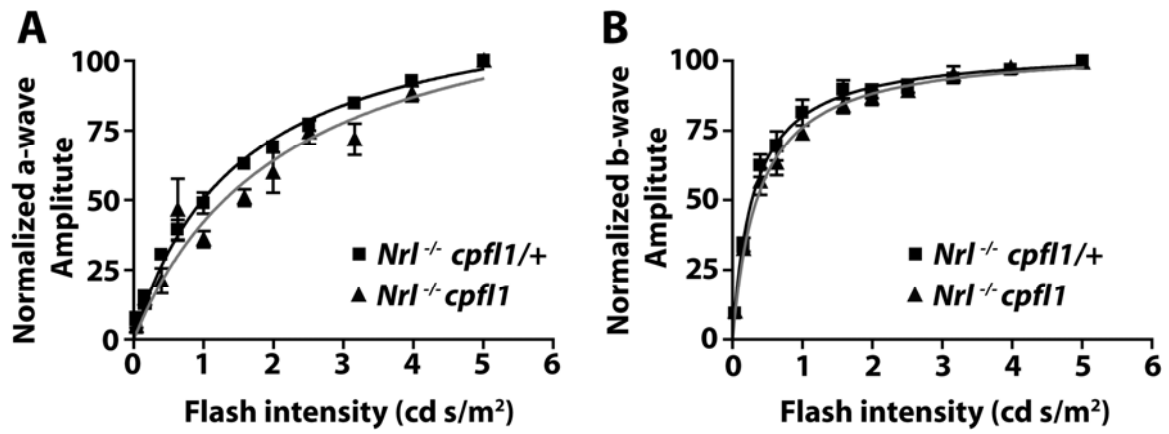

Supplementary Fig. 3

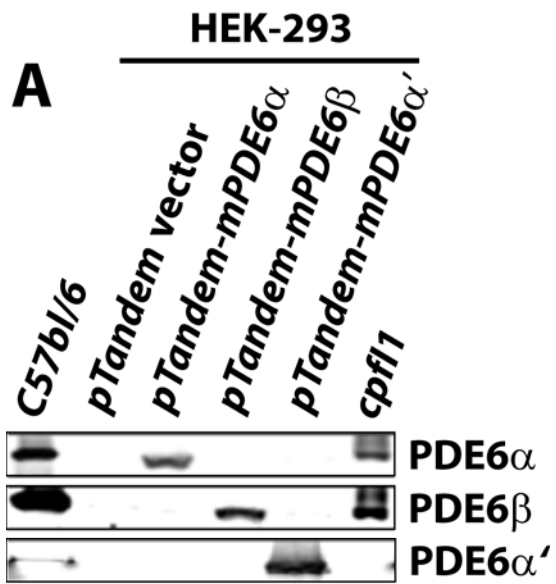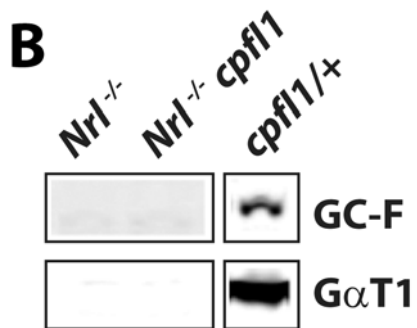

## Supplementary Fig. 4

|                 |                                                                     |
|-----------------|---------------------------------------------------------------------|
| mPDE6 $\alpha$  | MGEVTAEEVEKFLDSNIGFAKQYINFHVRGKVISDLLGAKEAAVDFS-NYHDVNSVEEES 59     |
| mPDE6 $\beta$   | MSLSEEQVRSFLDGNPTFAHQYFGKKLSPENVAGAC-EDGWLADCG-SLRRLCQVEESA 57      |
| mPDE6 $\alpha'$ | MGEISQEAVERYLEKNPCFAKEYFDKCLRVEALGVIFFKNSHAGVQTGLSLPEMTQVEESA 60    |
| mPDE6 $\alpha$  | IIFDLLRDVQENLQ-AEKCTFNVMKKLCFLLRADRMSLFMYRTRNGIAELATRLFNVHKD 118    |
| mPDE6 $\beta$   | ALFELVQDMQESVN-MERVVFKILRRLCTILHADRCSLFMYRQRNGIAELATRLFSVQPD 116    |
| mPDE6 $\alpha'$ | VCLELLQCMQDEAGSAEQMAHRALQRLAQLLQADCCSMFSCRARNGIPEVASRLLNVPT 120     |
| mPDE6 $\alpha$  | AVLEDCLVMPDSEIVFPLDMGVVGHVAHSHKIANVPNTEDEEHFCDVDNLTEYQTKNLL 178     |
| mPDE6 $\beta$   | SLLLEDCLVPPDSEIVFPLDIGIVGHVAQTKKMINVQDVAECPHFSFSADELTDYVTKNIL 176   |
| mPDE6 $\alpha'$ | SKFEDNLVAPDREVVFPLDIGIVGWAHVKKALNVSDVKKNSHFSDFMDKQTYGVTRNLL 180     |
| mPDE6 $\alpha$  | ASPIMNGKDVVAIIMAVNKIDEPHPTKRDEEILLKYLNFVNLIMKVFHLSYLHNCETRRG 238    |
| mPDE6 $\beta$   | STPIMNGKDVVAIIMAVNKIDGPCFTSEDEDVFTKYLNFATLNLKIYHLSYLHNCETRRG 236    |
| mPDE6 $\alpha'$ | AVPIVAGKEVLAVMVAVKISAPEFSKQDEEVFSKYSFVAVALRLQHTSYLYSVESRRS 240      |
| mPDE6 $\alpha$  | QILLWSGSKVFEELTDIERQFHKALYTVRAFNLNCDRYSVGLLDMTKQKEFFDVVWVLMGE 298   |
| mPDE6 $\beta$   | QVLLWSANKVFEELTDIERQFHKAFYTVRAYLNCERYSVGLLDMTKKEEFFDVVWVLMGE 296    |
| mPDE6 $\alpha'$ | QILLWSANKVFEELTDVERQFHKALYTIPTYLNCDRYSIGLLDMTKKEEFYDEWPICKLGE 300   |
| mPDE6 $\alpha$  | APAYSGPRTPDGREINFYKVIDYILHGKEDIKVIIPNPADHWALVSGLPTYVAQNGLICN 358    |
| mPDE6 $\beta$   | AQPYSGPRTPDGREIVFYKVIDYILHGKEDIKVIPTPADHWALASGLPTYVAESGFICN 356     |
| mPDE6 $\alpha'$ | VEPYKPKTPDGREIIFYKIIDYILHGKEEINVIPTPADHWLTVSGLPTYVAENGFICN 360      |
| mPDE6 $\alpha$  | IMNAPAEDEFFFEQKEPLDESGWMIKNVLSMPIVNVKKEEIVGVATFYNRKDGKPFDDMDDET 418 |
| mPDE6 $\beta$   | IMNASADEMFNFQEGPLDDSGWVIKNVLSMPIVNVKKEEIVGVATFYNRKDGKPFDDQDEV 416   |
| mPDE6 $\alpha'$ | MLNAPAEYFTFQKGFVDETGWVIKNVLSLPIVNVKKEEIVGVATFYNRKDGKPFDEHDEH 420    |
| mPDE6 $\alpha$  | LMESLTQFLGWSVLNPDITYESMNKLENRKDIFQDIVKYHVKCDNEEIQKILKTREYVYGE 478   |
| mPDE6 $\beta$   | LMESLTQFLGWSVLNPDITYDKMNKLENRKDIAQDMVLYHVRCDKDEIQEILPTDRDLGKE 476   |
| mPDE6 $\alpha'$ | ITETLTQFLGWSLLNPDITYERVNKLERSKIDIAQEMVMNLTKATPDEISSILKFKKELNVE 480  |
| mPDE6 $\alpha$  | P-WECEEEELAEILQGELPDAESYEINKFFHSDLPLETELVKCGIQMYELRVVDKFI 537       |
| mPDE6 $\beta$   | P-ADCEDELGKILKEELPGPTKFDIYEFHFSDLCELELVKCGIQMYELGVVRKFI 535         |
| mPDE6 $\alpha'$ | VIEECEEERQLLAILKEDLPDPRTADLYEFCFSDFPITHELVKCGLRFLFLEINVVEKFKV 540   |
| mPDE6 $\alpha$  | PQEAIVRRFMYSLSKGYRRITYHNWRHGFNVGQTMFSLLVTKLKYFTDLEALAMVTAAF 597     |
| mPDE6 $\beta$   | PQEVLRVFLFSVSKAYRRITYHNWRHGFNVQTMFTLLMTGKLSYYTDLEAFAMVTAGL 595      |
| mPDE6 $\alpha'$ | PVEVLTRWMTYVRKGYRPVTYHNWRHGFNVGQTMFTLLMTGRLKYYTDLEAFAMLAFAA 600     |
| mPDE6 $\alpha$  | CHDIDHRGTNNLYQMKSQNPLAKLHGSSILERRHHLEFGKTLRLDES LNIFQNLNRQHEH 657   |
| mPDE6 $\beta$   | CHDIDHRGTNNLYQMKSQNPLAKLHGSSILERRHHLEFGKFLAEE SLNIFQNLNRQHEH 655    |
| mPDE6 $\alpha'$ | CHDIDHRGTNNLYQMKSTSPARLHGTSILERRHLEYSKTLQDES LNIFQNLNKRQFET 660     |
| mPDE6 $\alpha$  | AIHMDIAIATDLALYFKKRTMFQKIVDQSKTYESTQEWYQYMMLEQTRKEIVMAMMMT 717      |
| mPDE6 $\beta$   | VIHLMDIAIATDLALYFKKRTMFQKIVDESKNYEDKKSWEVYLSLETTRKEIVMAMMMT 715     |
| mPDE6 $\alpha'$ | VIHLFEVAIATDLALYFKKRTMFQKIVDTCQMQSEETIKYVTSDPYTKKEIVMAMMMT 720      |
| mPDE6 $\alpha$  | ACDLSAITKPWEVQSKVALLVAAEFWEQDLERTVLDQQNPIPMMDRNKADEL PKLQVGF I 777  |
| mPDE6 $\beta$   | ACDLSAITKPWEVQSKVALLVAAEFWEQDLERTVLDQQPIPMMDRNKAAEL PKLQVGF I 775   |
| mPDE6 $\alpha'$ | ACDLSAITKPWEVQSQUALLVANEFWEQDLERTVLDQQPIPMMDRSKDEL PKLQVGF I 780    |
| mPDE6 $\alpha$  | DFVCTFVYKEFSRFFHEEITPMLDGI TNNRKEWKALADEYEAKMKALEEEKQQAQAA 837      |
| mPDE6 $\beta$   | DFVCTFVYKEFSRFFHEEILPMPDR LQNNRKEWKALADEYEAKVKALEEEKKKEEDRVAAK 835  |
| mPDE6 $\alpha'$ | DFVCTFVYKEFSRFFHEEITPMLNGLQNNRVEWKS LAEEYEAKVKVTEEEAGKQEEEASDG 840  |
| mPDE6 $\alpha$  | SGNQPGGNPTPGGAPASKSCCIQ 860                                         |
| mPDE6 $\beta$   | KVGTEVCNGGP--APKSSTCCIL 856                                         |
| mPDE6 $\alpha'$ | KAATDLGGSAAE--DKKSKTCLML 861                                        |

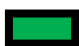

Peptides unique to PDE6 $\alpha$

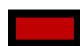

Peptides unique to PDE6 $\beta$

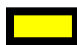

Peptides unique to rod PDE6 subunits

# Supplementary Fig. 5

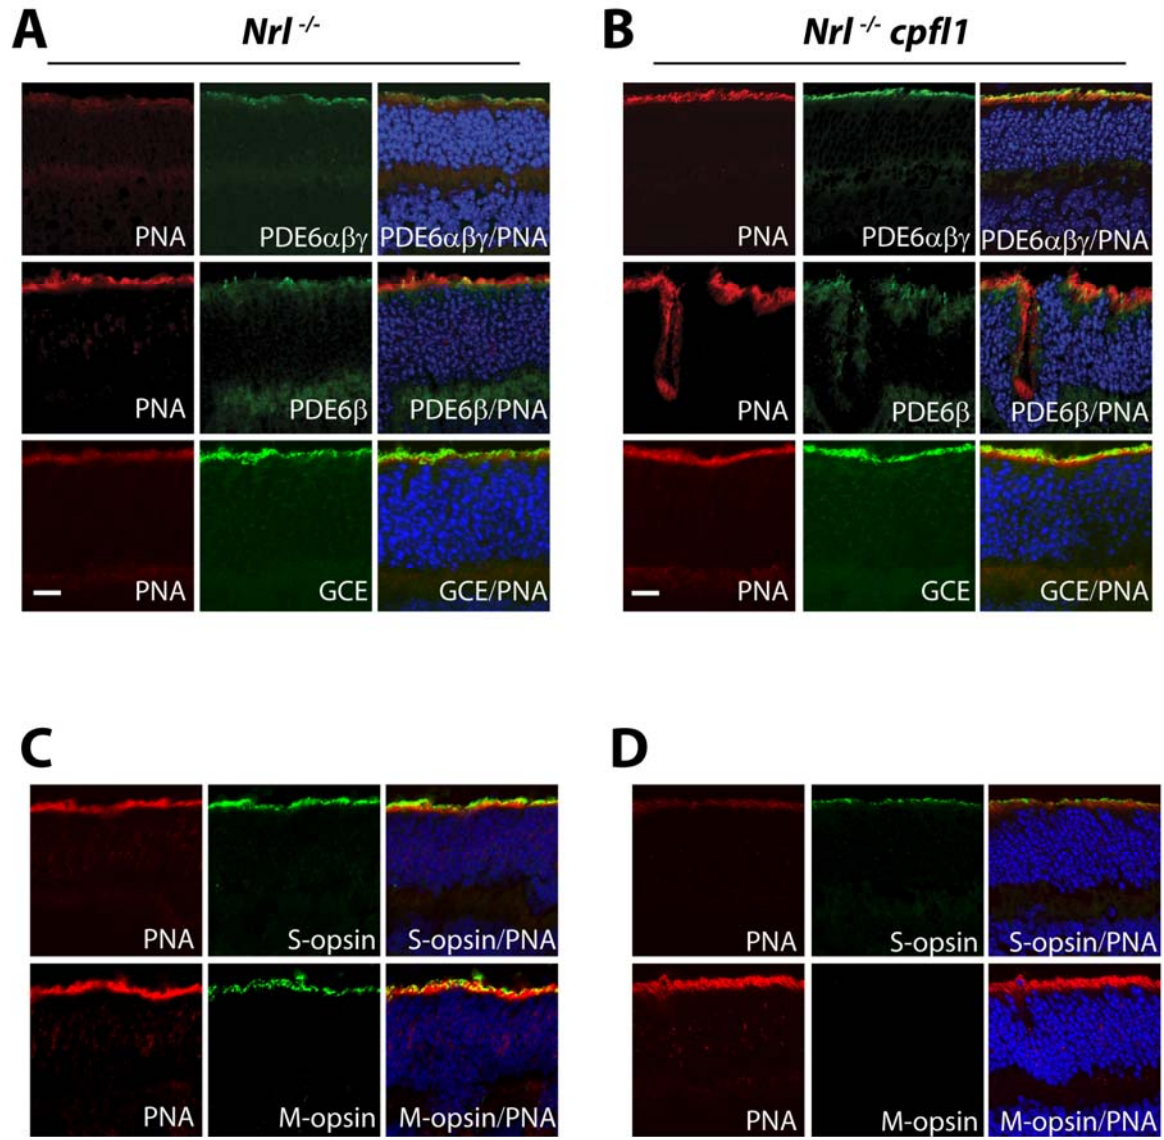

Supplementary Fig. 6

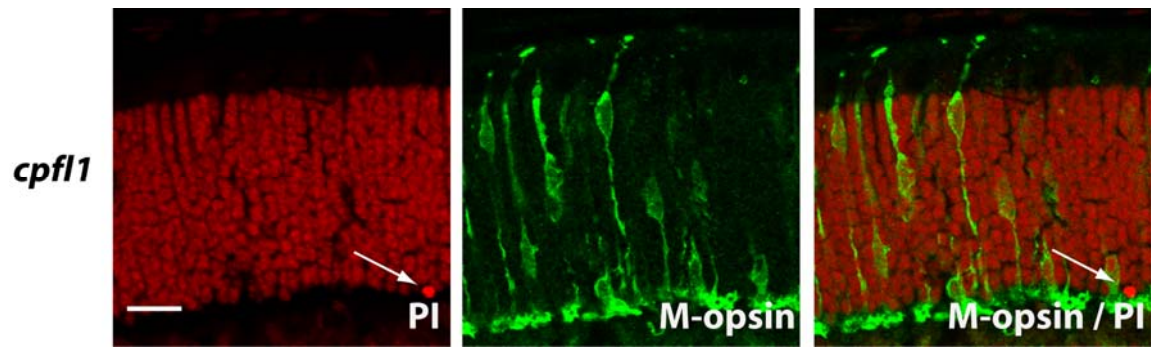

Supplementary Fig. 7

*Nrl*<sup>-/-</sup> *cpfl1* rd

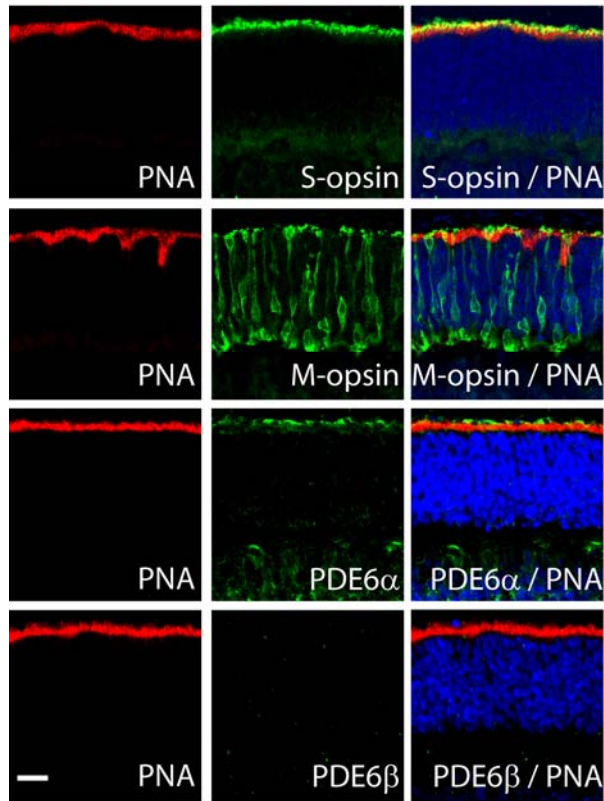



**Supplementary table 1.** Oligonucleotide used in this study for genotyping.

| <b>Genotype</b>     | <b>Primer sequences</b>                                                | <b>Product size (bp)</b>    |
|---------------------|------------------------------------------------------------------------|-----------------------------|
| <i>Nrl</i> -wt      | 5'-GTG TTCCTTGGCTGGAAAGA-3'<br>5'-CTGTTCACTGTGGGCTTTCA-3'              | 300 bp                      |
| <i>Nrl</i> -ko      | 5'-TTTCTGGTTCTGACAGTACTACG-3'<br>5'-ACCAAATTAAGGGCCAGCTCATTCT-3'       | 600 bp                      |
| <i>PDE6b</i> -wt    | 5'-TGACATTACTCCTTTTCCCTCAGTCTG-3'<br>5'-TACCCACCCTTCTAATTTTTCTCACGC-3' | 500 bp                      |
| <i>PDE6b</i> -rd1   | 5'-TGACATTACTCCTTTTCCCTCAGTCTG-3'<br>5'-GTAAACAGCAAGAGGCTTATTGGGAAC-3' | 700 bp                      |
| <i>PDE6c</i> -cpfl1 | 5'-TTCAACCATCTCTGCCCTTC-3'<br>5'-AGCAGACCTCTGCGAAGAAC-3'               | 450 bp (wt)<br>750 bp (mut) |

**Supplementary table 2.** Oligonucleotide used in this study for RT-PCR.

| <b>Gene</b>   | <b>Primer sequences</b>                                         | <b>Product size (bp)</b> |
|---------------|-----------------------------------------------------------------|--------------------------|
| <i>Hprt</i>   | 5'-CAAAC TTTGCTTTCCCTGGT-3'<br>5'-CAAGGGCATATCCAACAACA-3'       | 200 bp                   |
| <i>Pde6a</i>  | 5'-TGTGATCTCTCAGCCATCACCA-3'<br>5'-CTGGTTCTTTAACTGTCCAGTGCCA-3' | 516 bp                   |
| <i>Pde6b</i>  | 5'-CGATTTACGAAGAGATCCTG-3'<br>5'-CCTGTTCTAATGGCTTATACCAA-3'     | 302 bp                   |
| <i>Pde6g</i>  | 5'-CTGACAGAGTCCAGAAGCTAAGG-3'<br>5'-CTAGGGACTCAGGCTCAGGTTT-3'   | 418 bp                   |
| <i>Pde6c</i>  | 5'-AGCGGCAGTTTGAAACGGTGA-3'<br>5'-TCGCCTCGTACTCCTCCGCC-3'       | 500 bp                   |
| <i>Gnat1</i>  | 5'-GGGCCAGCGCTGAGGAGAAG-3'<br>5'-AGCCGGCGGAGTCATTGAGC-3'        | 438 bp                   |
| <i>Rho</i>    | 5'-TCAAGCCTGAGGTCAACAAC-3'<br>5'-GTCTTGGAAGCGGTGGCAGAG-3'       | 439 bp                   |
| <i>Opn1sw</i> | 5'-GGTCATTGGCTTTCTGG-3'<br>5'-TGCAGGCCCTCAGGGATG-3'             | 175 bp                   |
| <i>Opn1mw</i> | 5'-GCCCAGACGTGTTTCAGCG-3'<br>5'-GACCATCACCACCACCAT-3'           | 212 bp                   |
| <i>Nrl</i>    | 5'-CTATGGAAGGGCCTCTTGG-3'<br>5'-GCCACGATGCTCAGAAGTTT-3'         | 540 bp                   |
